# Supplementary material for: Consensus Guideline for the Management of Patients with Peritoneal Mesothelioma
Source: bioRxiv or medRxiv preprint supplement (doi:10.1101/2024.04.10.24305432), 2024-04-13

# Supplemental Figure 1

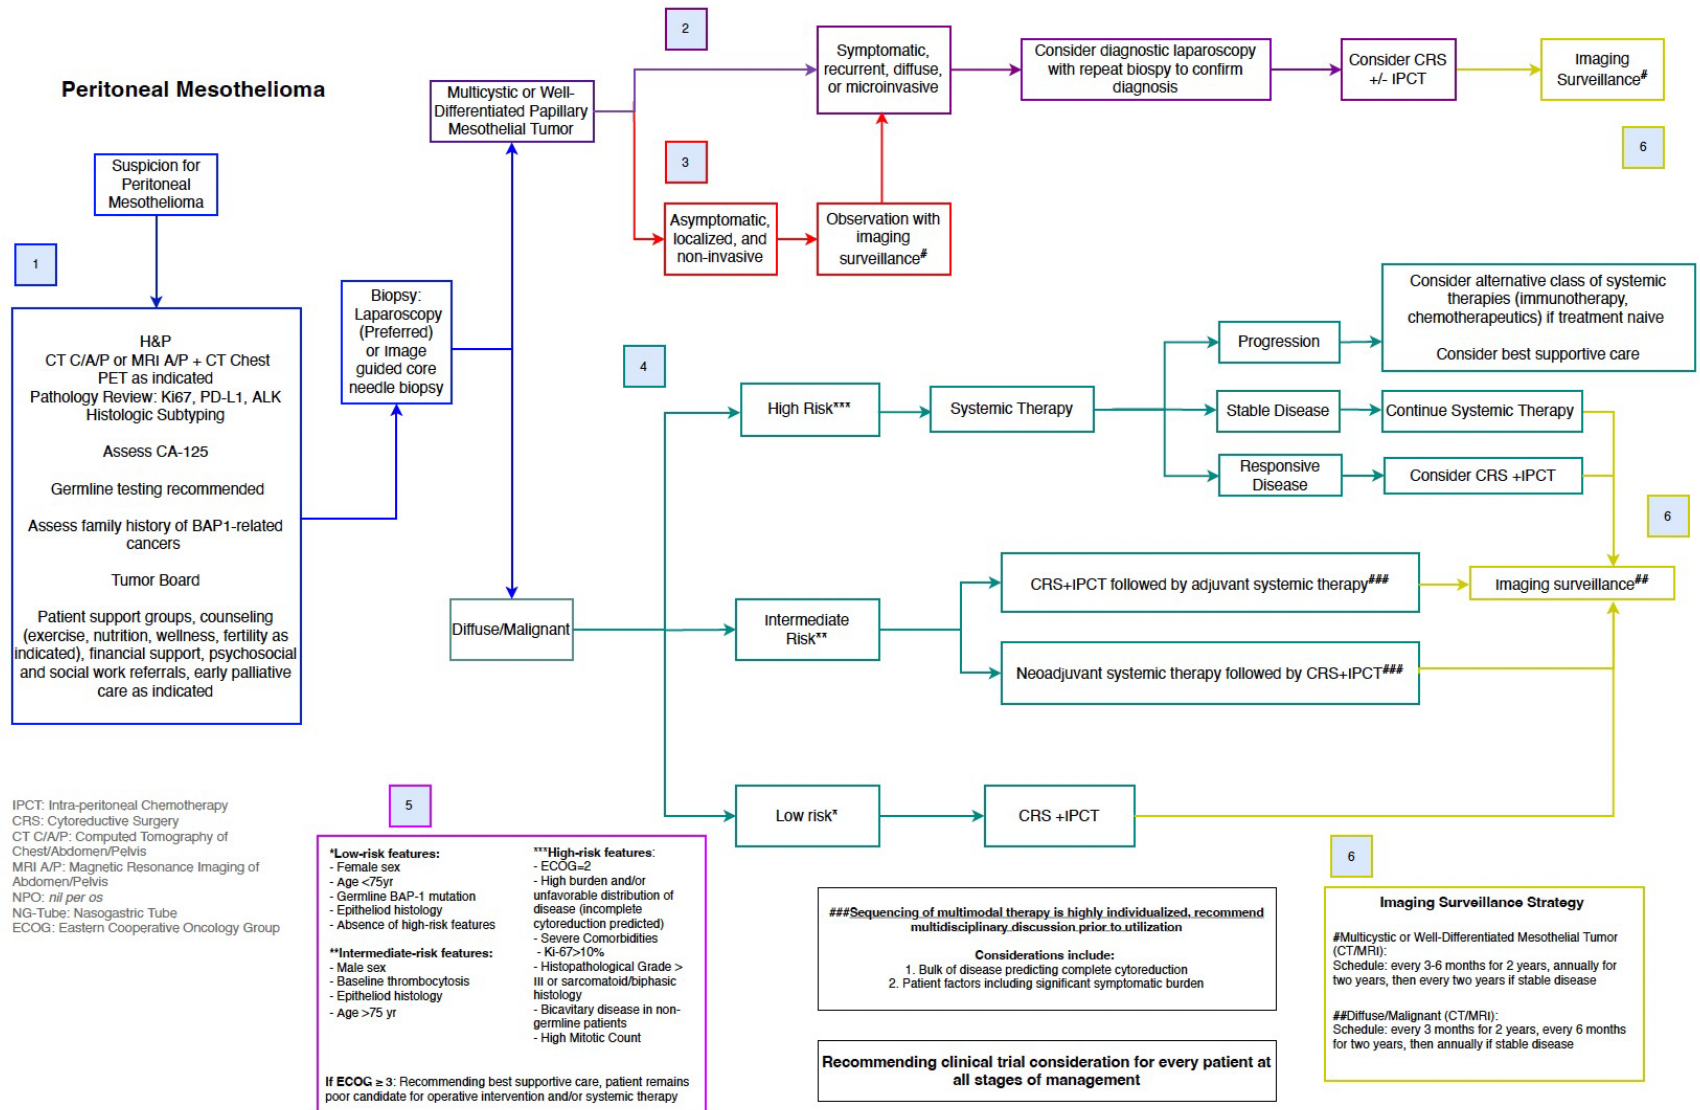

Supplement: Supplementary file [file media-1.pdf]
