# Supplementary material for: Consensus Guideline for the Management of Patients with Peritoneal Mesothelioma
Source: bioRxiv or medRxiv preprint supplement (doi:10.1101/2024.04.10.24305432), 2024-04-13
Supplement: Supplementary file [file media-2.pdf]

## SUPPLEMENTARY MATERIAL

**Supplemental Table 1. Search Strategy for Key Question:** In patients with PeM undergoing cytoreductive surgery (CRS), what are the optimal sequences and regimens of systemic therapy? PubMed; restrictions: any date - 2023/06/15, performed on humans

| <b>Search line</b> | <b>Search term</b>                                                                                                                                                                                                                                                                                                                   |
|--------------------|--------------------------------------------------------------------------------------------------------------------------------------------------------------------------------------------------------------------------------------------------------------------------------------------------------------------------------------|
| <b>1</b>           | peritoneal mesothelioma[tw] OR mesothelioma[MeSH Major Topic] OR "Mesothelioma, Malignant"[MeSH Major Topic]                                                                                                                                                                                                                         |
| <b>2</b>           | ("surgery peritoneal"[tiab:~5]) OR ("surgery peritoneum"[tiab:~5]) OR ("resection peritoneal"[tiab:~5]) OR ("resection peritoneum"[tiab:~5]) OR (Cytoreduc*[tw] OR CRS[tw]) OR intraperitoneal chemotherapy*[tw] OR HIPEC*[tw] OR intraperitoneal chemotherapy*[tw] OR (hyperthermic intraperitoneal chemotherapy[Mesh Major Topic]) |
| <b>3</b>           | #1 AND #2                                                                                                                                                                                                                                                                                                                            |
